# Supplementary material for: Impact of Smoking Status on Lung Cancer Characteristics and Mortality Rates between Screened and Non-Screened Lung Cancer Cohorts: Real-World Knowledge Translation and Education
Source: MDPI journal article supplement (doi:10.3390/jpm12010026), 2022-01-02
Supplement: s1 [file s1]

| <b>Supplement Table S1.</b> Clinical characteristics of 1651 non-smokers with lung cancer according to screening status. |                          |                                |                       |
|--------------------------------------------------------------------------------------------------------------------------|--------------------------|--------------------------------|-----------------------|
|                                                                                                                          | <b>Screened (n = 81)</b> | <b>Non-Screened (n = 1570)</b> | <b><i>p</i>-Value</b> |
| Mean age at diagnosis, years (mean, SD)                                                                                  | 59.41 ± 7.41             | 66.36 ± 12.78                  | <0.001                |
| Median age at diagnosis, years (range)                                                                                   | 66 (42-77)               | 66 (40-99)                     |                       |
| Gender (n, %)                                                                                                            |                          |                                | 0.159                 |
| Male                                                                                                                     | 24 (29.6%)               | 589 (37.5%)                    |                       |
| Female                                                                                                                   | 57 (70.4%)               | 981 (62.5%)                    |                       |
| Alcohol drinking consumption                                                                                             | 4 (4.9%)                 | 39 (2.5%)                      | 0.156                 |
| Betel nut consumption                                                                                                    | 0 (0%)                   | 8 (0.5%)                       | 1                     |
| Histology                                                                                                                |                          |                                | 0.002                 |
| Adenocarcinoma                                                                                                           | 79 (97.5%)               | 1269 (80.8%)                   |                       |
| Squamous cell carcinoma                                                                                                  | 1 (1.2%)                 | 170 (10.8%)                    |                       |
| Small cell carcinoma                                                                                                     | 1 (1.2%)                 | 79 (5.0%)                      |                       |
| Other                                                                                                                    | 0                        | 52 (3.3%)                      |                       |
| Adenocarcinoma spectrum                                                                                                  |                          |                                | <0.001                |
| AAH                                                                                                                      | 6 (7.4%)                 | 0 (0%)                         |                       |
| AIS                                                                                                                      | 7 (8.6%)                 | 0 (0%)                         |                       |
| MIA                                                                                                                      | 9 (11.1%)                | 0 (0%)                         |                       |
| IPA                                                                                                                      | 57 (70.4%)               | 1269 (100%)                    |                       |
| Stage                                                                                                                    |                          |                                | <0.001                |
| Carcinoma in situ                                                                                                        | 14 (17.3%)               | 4 (0.3%)                       |                       |
| I                                                                                                                        | 54 (66.7%)               | 326 (20.8%)                    |                       |
| II                                                                                                                       | 4 (4.9%)                 | 64 (4.1%)                      |                       |
| III                                                                                                                      | 2 (2.5%)                 | 334 (21.3%)                    |                       |
| IV                                                                                                                       | 7 (8.6%)                 | 842 (53.6%)                    |                       |
| Curative surgery rate                                                                                                    | 35 (83.3%)               | 459 (29.2%)                    | <0.001                |
| Targeted therapy                                                                                                         | 5 (11.9%)                | 319 (20.3%)                    | 0.241                 |
| Mean tumor size (mm)                                                                                                     | 16.16 ± 13.74            | 41.25 ± 23.36                  | <0.001                |
| Deaths                                                                                                                   | 8 (9.9%)                 | 1159 (73.8%)                   | <0.001                |

|                                                                                                                                                                                            |                 |                 |        |
|--------------------------------------------------------------------------------------------------------------------------------------------------------------------------------------------|-----------------|-----------------|--------|
| Mean survival days                                                                                                                                                                         | 892.05 ± 516.24 | 676.03 ± 600.47 | <0.001 |
| Median survival days                                                                                                                                                                       | 825 (30-2599)   | 517.5 (1-3128)  |        |
| Abbreviations: AAH: atypical adenomatous hyperplasia; AIS: adenocarcinoma in situ; IPA: invasive pulmonary adenocarcinoma; MIA: minimally invasive adenocarcinoma; SD: standard deviation. |                 |                 |        |

| <b>Supplement Table S2.</b> Clinical characteristics of 1232 smokers with lung cancer according to screening status. |                          |                                |                       |
|----------------------------------------------------------------------------------------------------------------------|--------------------------|--------------------------------|-----------------------|
|                                                                                                                      | <b>Screened (n = 12)</b> | <b>Non-Screened (n = 1220)</b> | <b><i>p</i>-Value</b> |
| Mean age at diagnosis, years (mean, SD)                                                                              | 63.33 ± 11.83            | 69.15 ± 13.00                  | 0.118                 |
| Median age at diagnosis, years (range)                                                                               | 72 (42-83)               | 71 (41-99)                     |                       |
| Gender (n, %)                                                                                                        |                          |                                | 1.000                 |
| Male                                                                                                                 | 12 (100%)                | 1175 (96.3%)                   |                       |
| Female                                                                                                               | 0 (0%)                   | 45 (3.7%)                      |                       |
| Smoking consumption                                                                                                  | 12 (100%)                | 1220 (100%)                    |                       |
| Alcohol drinking consumption                                                                                         | 6 (50%)                  | 405 (33.2%)                    | 0.230                 |
| Betel nut                                                                                                            | 3 (25%)                  | 187 (15.3%)                    | 0.411                 |
| Histology                                                                                                            |                          |                                | 0.210                 |
| Adenocarcinoma                                                                                                       | 9 (75%)                  | 744 (61%)                      |                       |
| Squamous cell carcinoma                                                                                              | 2 (16.7%)                | 273 (22.4%)                    |                       |
| Small cell carcinoma                                                                                                 | 0 (0%)                   | 178 (14.6%)                    |                       |
| Other                                                                                                                | 1 (8.3%)                 | 25 (2%)                        |                       |
| Adenocarcinoma spectrum                                                                                              |                          |                                |                       |
| AAH                                                                                                                  | 0 (0%)                   | 0 (0%)                         |                       |
| AIS                                                                                                                  | 0 (0%)                   | 0 (0%)                         |                       |
| MIA                                                                                                                  | 0 (0%)                   | 0 (0%)                         |                       |
| IPA                                                                                                                  | 9 (75%)                  | 744 (60.9%)                    |                       |
| Stage                                                                                                                |                          |                                | <0.001                |
| Carcinoma in situ                                                                                                    | 0 (0%)                   | 0 (0%)                         |                       |
| I                                                                                                                    | 8 (66.7%)                | 129 (10.6%)                    |                       |
| II                                                                                                                   | 1 (8.3%)                 | 60 (4.9%)                      |                       |

|                                                                                                                                                                                            |                 |                 |        |
|--------------------------------------------------------------------------------------------------------------------------------------------------------------------------------------------|-----------------|-----------------|--------|
| III                                                                                                                                                                                        | 2 (16.7%)       | 302 (24.8%)     |        |
| IV                                                                                                                                                                                         | 1 (8.3%)        | 729 (59.8%)     |        |
| Curative surgery rate                                                                                                                                                                      | 10 (83.3%)      | 211 (17.3%)     | <0.001 |
| Targeted therapy                                                                                                                                                                           | 0 (0%)          | 197 (16.1%)     | 0.232  |
| Mean tumor size (mm)                                                                                                                                                                       | 26.75 ± 19.99   | 51.12 ± 26.60   | 0.001  |
| Deaths                                                                                                                                                                                     | 2 (16.7%)       | 1047 (85.8%)    | <0.001 |
| Mean survival days                                                                                                                                                                         | 646.08 ± 337.21 | 444.85 ± 468.43 | 0.064  |
| Median survival days                                                                                                                                                                       | 683 (22-1217)   | 304 (1-2937)    |        |
| Abbreviations: AAH: atypical adenomatous hyperplasia; AIS: adenocarcinoma in situ; IPA: invasive pulmonary adenocarcinoma; MIA: minimally invasive adenocarcinoma; SD: standard deviation. |                 |                 |        |
